# Supplementary material for: Hydrological recovery in two large forested watersheds of Southeastern China: importance of watershed property in determining hydrological responses to reforestation
Source: Copernicus journal article supplement (doi:10.5194/hess-2016-327), 2016-07-04
Supplement: Supplementary file 1 [file hess-2016-327-supplement.pdf]

## Supplemental Materials

Table S1 Selected pairs for high flows ( $Q_{5\%}$  and  $Q_{10\%}$ ) in the Pingjiang and Xiangshui watersheds

| High flows       | Selected years | Pingjiang watershed |                                        |       | Xiangshui watershed |              |                                        |       |
|------------------|----------------|---------------------|----------------------------------------|-------|---------------------|--------------|----------------------------------------|-------|
|                  |                | Paired years        | R <sub>5%</sub><br>Precipitation (mm)  |       | Selected years      | Paired years | R <sub>5%</sub><br>Precipitation (mm)  |       |
| Q <sub>5%</sub>  | 1964           | 2004                | 691.4                                  | 701.4 | 1968                | 1999         | 648.0                                  | 644.9 |
|                  | 1976           | 1991                | 725.4                                  | 729.7 | 1971                | 2004         | 597.2                                  | 592.5 |
|                  | 1987           | 1996                | 713                                    | 717.8 | 1972                | 1998         | 659                                    | 660.1 |
|                  | 1968           | 2006                | 878.9                                  | 878.8 | 1974                | 1994         | 736.1                                  | 731.6 |
|                  | 1973           | 2006                | 869.2                                  | 878.8 | 1975                | 1995         | 755.1                                  | 752.8 |
|                  | 1974           | 2001                | 756.4                                  | 770.5 | 1976                | 1999         | 645.8                                  | 644.9 |
|                  | 1985           | 2000                | 691.7                                  | 678.1 | 1978                | 2000         | 808.3                                  | 804.7 |
|                  |                |                     |                                        |       | 1982                | 2002         | 693.6                                  | 699.4 |
|                  |                |                     |                                        |       | 1983                | 1996         | 894.2                                  | 891.7 |
|                  |                |                     |                                        |       |                     |              |                                        |       |
| Q <sub>10%</sub> |                |                     | R <sub>10%</sub><br>Precipitation (mm) |       |                     |              | R <sub>10%</sub><br>Precipitation (mm) |       |
|                  | 1965           | 1996                | 277.6                                  | 280.2 | 1970                | 2000         | 390.3                                  | 389.8 |
|                  | 1966           | 1993                | 266.3                                  | 270.7 | 1970                | 2002         | 390.3                                  | 389.6 |
|                  | 1976           | 1993                | 337.4                                  | 270.7 | 1971                | 2004         | 238.7                                  | 240   |
|                  | 1980           | 1999                | 315.4                                  | 315.2 | 1972                | 2000         | 263.1                                  | 360.8 |
|                  | 1980           | 2000                | 315.4                                  | 317.7 | 1973                | 1992         | 421.1                                  | 419.2 |
|                  | 1985           | 1996                | 276.7                                  | 280.2 | 1980                | 2001         | 335.3                                  | 336.1 |
|                  | 1984           | 2001                | 332.5                                  | 333.4 | 1981                | 2001         | 335.0                                  | 336.1 |
|                  |                |                     |                                        | 1987  | 2005                | 323.9        | 318.6                                  |       |

Table S2 Selected pairs for median and low flows in the Pingjiang and Xiangshui watersheds

| Watersheds | Selected years | Paired years | Precipitation (mm) |         | Tave (°C) |       | Tmax (°C) |       |
|------------|----------------|--------------|--------------------|---------|-----------|-------|-----------|-------|
| Pingjiang  | 1965           | 1995         | 1574.95            | 1542.54 | 19.06     | 18.66 | 24.53     | 24.95 |
|            | 1968           | 1999         | 1550.26            | 1554.50 | 19.29     | 19.45 | 25.63     | 25.06 |
|            | 1969           | 2000         | 1455.62            | 1484.41 | 18.64     | 18.93 | 24.55     | 24.47 |
|            | 1969           | 1996         | 1455.62            | 1430.87 | 18.64     | 18.47 | 24.58     | 24.47 |
|            | 1970           | 1994         | 1891.53            | 1850.62 | 18.38     | 18.94 | 24.61     | 23.85 |
|            | 1972           | 1996         | 1450.16            | 1430.87 | 18.76     | 18.47 | 24.58     | 24.61 |
|            | 1972           | 2000         | 1450.16            | 1484.41 | 18.76     | 18.93 | 24.58     | 24.47 |
|            | 1974           | 1995         | 1530.18            | 1542.54 | 18.81     | 18.66 | 24.53     | 24.79 |
|            | 1977           | 1993         | 1382.30            | 1354.62 | 18.97     | 18.61 | 24.59     | 24.95 |
|            | 1978           | 1991         | 1222.65            | 1196.88 | 19.24     | 19.08 | 24.70     | 25.06 |
|            | 1979           | 2004         | 1376.78            | 1348.38 | 19.23     | 19.33 | 25.73     | 25.20 |
|            | 1981           | 2001         | 1693.93            | 1643.60 | 18.76     | 19.24 | 25.13     | 24.39 |
| Xiangshui  | 1968           | 1999         | 1384.54            | 1372.82 | 25.72     | 25.71 | 1968      | 1999  |
|            | 1970           | 1997         | 1916.12            | 1915.69 | 24.68     | 24.96 | 1970      | 1997  |
|            | 1970           | 1992         | 1916.12            | 1954.50 | 24.68     | 24.97 | 1970      | 1992  |
|            | 1972           | 1989         | 1346.64            | 1305.32 | 25.34     | 25.03 | 1972      | 1989  |
|            | 1974           | 1996         | 1623.52            | 1609.27 | 25.11     | 25.07 | 1974      | 1996  |
|            | 1976           | 1998         | 1571.99            | 1579.53 | 24.65     | 25.77 | 1976      | 1998  |
|            | 1980           | 1993         | 1715.93            | 1677.41 | 25.08     | 24.87 | 1980      | 1993  |
|            | 1981           | 1996         | 1611.93            | 1609.27 | 25.09     | 25.07 | 1981      | 1996  |
|            | 1982           | 1993         | 1659.28            | 1677.41 | 24.76     | 24.87 | 1982      | 1993  |
|            | 1988           | 1998         | 1573.69            | 1579.53 | 24.67     | 25.77 | 1988      | 1998  |
| 1985       | 2000           | 1766.01      | 1756.84            | 24.3    | 25.21     | 1985  | 2000      |       |

Table S3 Selected pairs for recession constants in the Pingjiang and Xiangshui watersheds

| Watersheds          | Selected rainfall events | Paired rainfall events | Antecedent rainfall (3-day average) (mm) |        | Antecedent streamflow (3-day) (m <sup>3</sup> /s) |        | Peak rainfall |       |       |
|---------------------|--------------------------|------------------------|------------------------------------------|--------|---------------------------------------------------|--------|---------------|-------|-------|
| Pingjiang           | 1966<br>8.15-8.23        | 1995<br>5.21-5.30      | 0.20                                     | 0.00   | 36.07                                             | 66.77  | 42.30         | 40.10 |       |
|                     | 1989<br>6.17-6.25        | 1995<br>5.22-5.30      | 0.70                                     | 0.00   | 37.93                                             | 66.77  | 42.40         | 40.10 |       |
|                     | 1976<br>5.23-5.30        | 1993<br>11.27- 12.03   | 0.00                                     | 0.10   | 71.10                                             | 25.53  | 36.10         | 36.20 |       |
|                     | 1976<br>10.3-10.10       | 1993<br>11.27- 12.03   | 0.00                                     | 0.10   | 34.47                                             | 25.53  | 37.60         | 36.20 |       |
|                     | 1981<br>10.14-10.21      | 1993<br>11.4- 11.11    | 0.00                                     | 0.23   | 28.70                                             | 26.07  | 35.30         | 35.90 |       |
|                     | 1976<br>5.23-5.30        | 1993<br>11.4- 11.11    | 0.00                                     | 0.23   | 71.10                                             | 26.07  | 36.10         | 35.90 |       |
|                     | 1973<br>8.2-8.10         | 1997<br>11.11-11.19    | 0.00                                     | 0.00   | 23.00                                             | 34.40  | 28.80         | 29.90 |       |
|                     | 1983<br>7.22-7.29        | 1997<br>11.11-11.19    | 0.00                                     | 0.00   | 26.57                                             | 34.40  | 31.10         | 29.90 |       |
|                     | 1966<br>8.15-8.23        | 2002<br>3.20-3.27      | 0.20                                     | 0.00   | 36.07                                             | 34.40  | 42.30         | 40.20 |       |
|                     | 1989<br>3.30-4.5         | 2002<br>3.20-3.2       | 0.64                                     | 0.00   | 27.03                                             | 34.40  | 40.30         | 40.20 |       |
|                     | Xiangshui                | 1974<br>4.28-5.5       | 2000<br>10.1-10.8                        | 3.50   | 0.03                                              | 109.20 | 79.50         | 47.50 | 45.10 |
|                     |                          | 1972<br>9.14-9.21      | 1995<br>5.18-5.25                        | 0.60   | 0.33                                              | 51.50  | 134.70        | 26.10 | 26.60 |
|                     |                          | 1973<br>11.23-11.30    | 1997<br>1.30- 2.5                        | 0.27   | 0.00                                              | 62.60  | 45.00         | 22.60 | 22.90 |
|                     |                          | 1972<br>7.9-7.16       | 1992<br>3.14-3.20                        | 0.70   | 0.57                                              | 49.00  | 120.20        | 28.10 | 28.40 |
| 1971<br>10.26- 11.1 |                          | 1995<br>9.7- 9.14      | 0.53                                     | 0.70   | 40.20                                             | 129.30 | 32.20         | 32.60 |       |
| 1969<br>10.14-10.21 |                          | 1991<br>6.17-6.24      | 0.66                                     | 0.90   | 50.80                                             | 47.80  | 64.60         | 61.20 |       |
| 1968<br>2.23-3.3    |                          | 1993<br>11.27-12. 2    | 0.00                                     | 0.16   | 30.86                                             | 52.30  | 20.50         | 20.80 |       |
| 1974<br>10.28-11.3  |                          | 1998<br>1.11-1.16      | 3.13                                     | 0.20   | 65.90                                             | 86.20  | 36.80         | 36.90 |       |
| 1976<br>4.30-5.6    | 1994<br>4.30-5.6         | 0.00                   | 1.23                                     | 192.10 | 217.80                                            | 41.40  | 42.60         |       |       |
